# Supplementary material for: Dual modification of LiNi0.6Co0.2Mn0.2O2 with MgHPO4 as a high-performance cathode material for Li-ion batteries
Source: Royal Society of Chemistry journal article supplement (doi:10.1039/d1ya00031d), 2021-12-08
Supplement: d1ya00031d1.pdf [file d1ya00031d1.pdf]

## Supporting Information

### Dual modification of $\text{LiNi}_{0.6}\text{Co}_{0.2}\text{Mn}_{0.2}\text{O}_2$ with $\text{MgHPO}_4$ as a high-performance cathode material for Li-ion batteries

Wujie Ge<sup>a</sup>, Yuanxiang Fu<sup>a</sup>, Xianguo Ma<sup>a</sup>, Xiang Li<sup>b\*</sup>, Gongchang Peng<sup>c\*</sup>

\*Corresponding Author

<sup>a</sup> School of Chemical Engineering, Guizhou Institute of Technology, Guiyang, 550003, PR China

<sup>b</sup> School of Chemical Engineer and Pharmacy, Henan University of Science and Technology, Luoyang, 471023, PR China

<sup>c</sup> Chengdu Institute of Organic Chemistry, Chinese Academy of Sciences, Chengdu 610041, PR China.

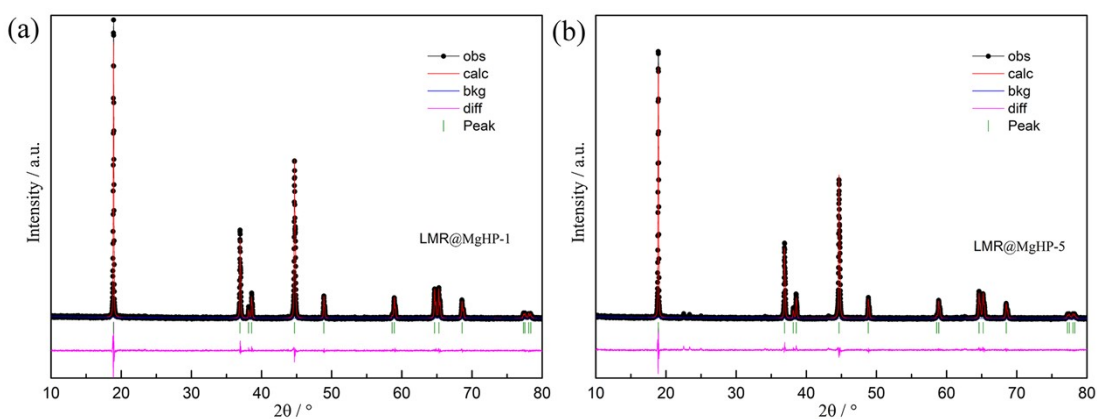

Fig. S1 Rietveld refinements from the XRD patterns of (a) LMR@MgHP-1 and (b) LMR@MgHP-5.

Table S1. Rietveld refinement results of LMR@MgHP-1 X-ray powder diffraction based on different possible models.

| Hypothetical models | Location of Mg atoms | Reliability factors / % |          |                |           |
|---------------------|----------------------|-------------------------|----------|----------------|-----------|
|                     |                      | $R_p$                   | $R_{wp}$ | Bragg R-factor | RF-factor |
| No.1                | Nowhere              | 6.46                    | 8.15     | 6.46           | 4.01      |
| No.2                | Li layer             | 6.20                    | 7.87     | 5.97           | 3.57      |
| No.3                | TM layer             | 6.49                    | 8.35     | 6.54           | 3.94      |
| No.4                | Dual sites           | 6.48                    | 8.34     | 6.53           | 3.94      |

Table S2. Rietveld refinement results of LMR@MgHP-2 X-ray powder diffraction based on different possible models.

| Hypothetical models | Location of Mg atoms | Reliability factors / % |          |                |           |
|---------------------|----------------------|-------------------------|----------|----------------|-----------|
|                     |                      | $R_p$                   | $R_{wp}$ | Bragg R-factor | RF-factor |
| No.1                | Nowhere              | 6.67                    | 8.59     | 6.10           | 3.65      |

|             |            |      |      |      |      |
|-------------|------------|------|------|------|------|
| <b>No.2</b> | Li layer   | 6.57 | 8.42 | 6.01 | 3.51 |
| <b>No.3</b> | TM layer   | 6.72 | 8.69 | 8.69 | 3.73 |
| <b>No.4</b> | Dual sites | 6.69 | 8.66 | 6.12 | 3.65 |

Table S3. Rietveld refinement results of LMR@MgHP-5 X-ray powder diffraction based on different possible models.

| <b>Hypothetical models</b> | <b>Location of Mg atoms</b> | <b>Reliability factors / %</b> |          |                |           |
|----------------------------|-----------------------------|--------------------------------|----------|----------------|-----------|
|                            |                             | $R_p$                          | $R_{wp}$ | Bragg R-factor | RF-factor |
| <b>No.1</b>                | Nowhere                     | 6.70                           | 8.79     | 6.24           | 3.98      |
| <b>No.2</b>                | Li layer                    | 6.51                           | 8.57     | 6.21           | 3.82      |
| <b>No.3</b>                | Ni layer                    | 6.75                           | 8.88     | 6.30           | 4.04      |
| <b>No.4</b>                | Dual sites                  | 6.88                           | 9.00     | 6.60           | 4.19      |

Table. S4 EDX analysis results of LMR@MgHP-2 sample.

| Element | Ni K  | Co K  | Mn K  | Mg K | P K  | O K   |
|---------|-------|-------|-------|------|------|-------|
| Wt%     | 41.50 | 13.92 | 13.12 | 0.35 | 0.57 | 30.54 |
| At%     | 22.65 | 7.57  | 7.65  | 0.47 | 0.53 | 61.13 |

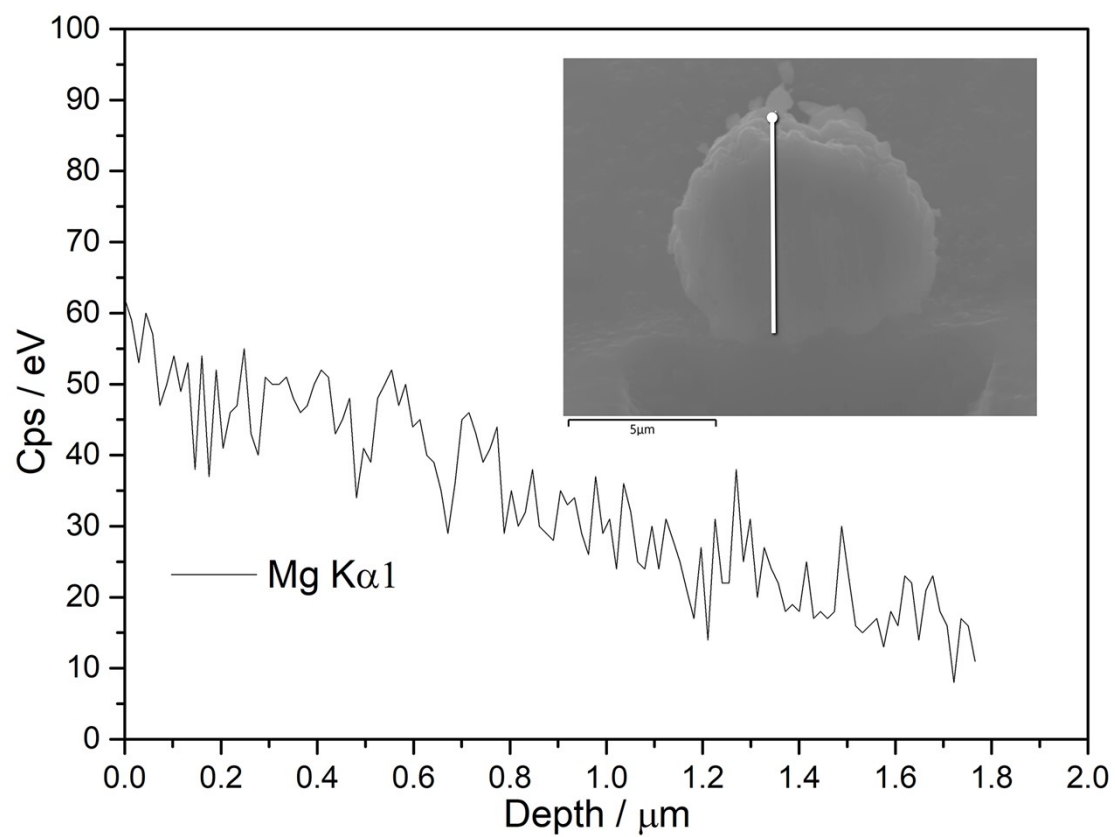

Fig. S2 The variations in the atomic concentration of Mg element as a function of depth for LMR@MgHP-2 sample.

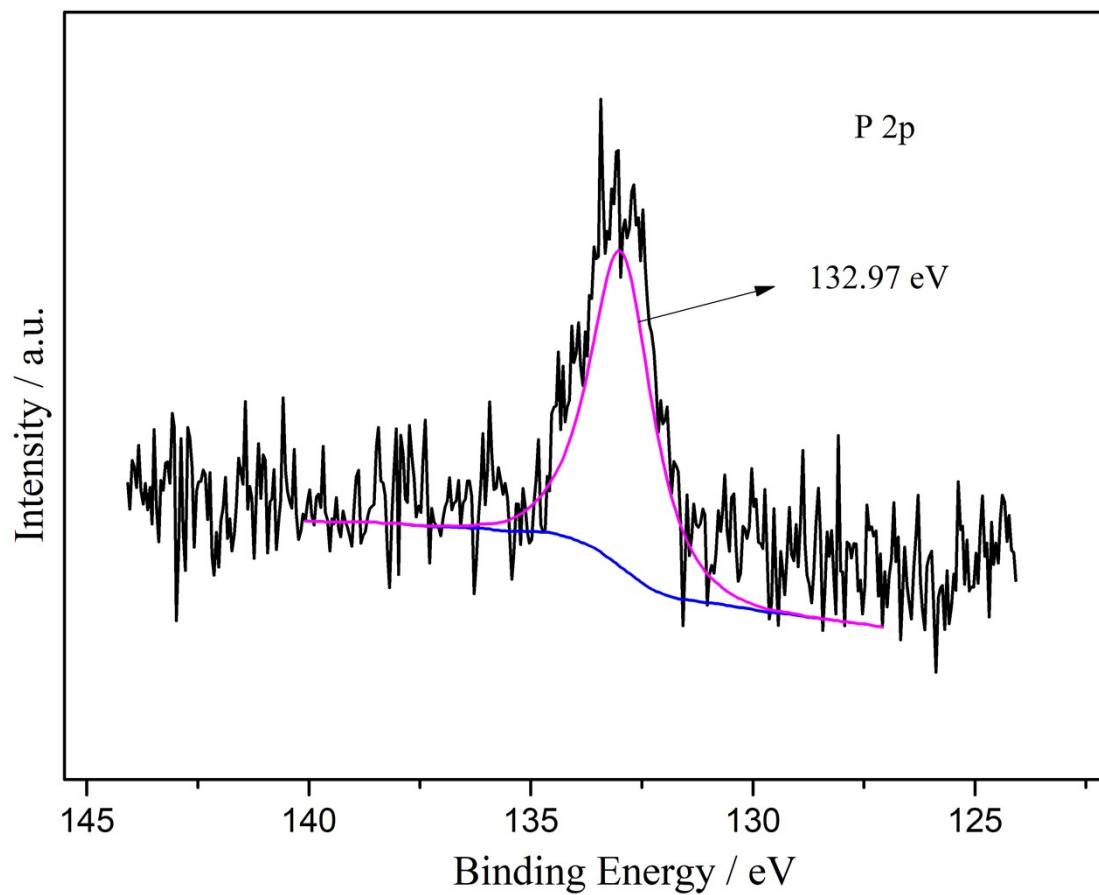

Fig. S3 P 2p spectra for LMR@MgHP-2 sample.

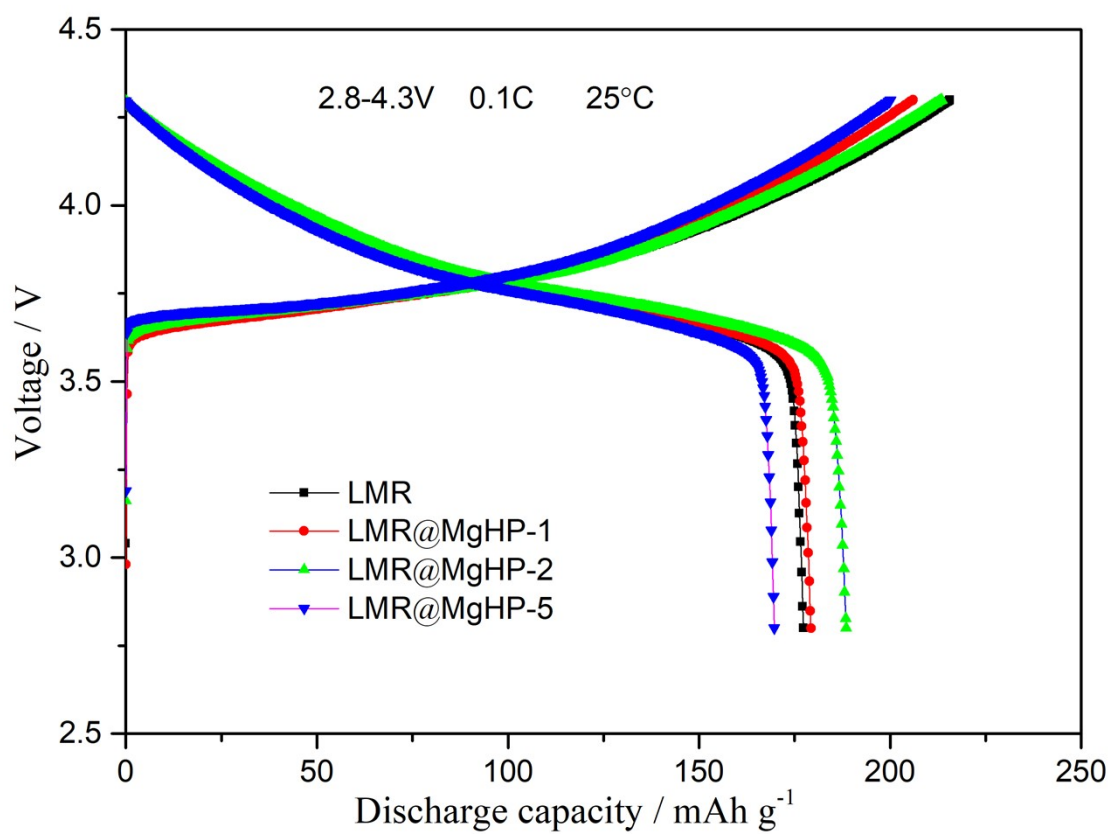

Fig. S4 The initial charge-discharge profiles at 0.1C between 2.8 and 4.3 V for all the samples.

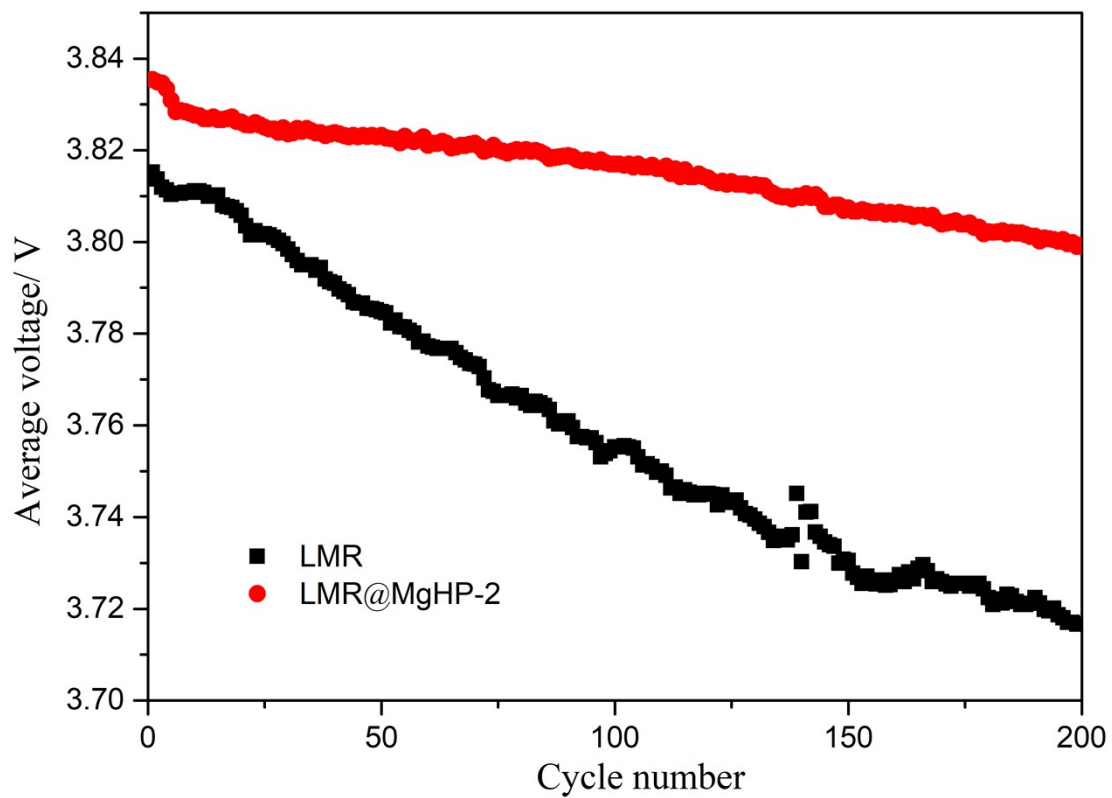

Fig. S5 Average discharge potential of LMR and LMR@MgHP-2 at 1C.
